# Supplementary material for: Efficient Epidermal Growth Factor Receptor Targeting Oligonucleotide as a Potential Molecule for Targeted Cancer Therapy
Source: MDPI journal article supplement (doi:10.3390/ijms20194700), 2019-09-22
Supplement: s1 [file s1]

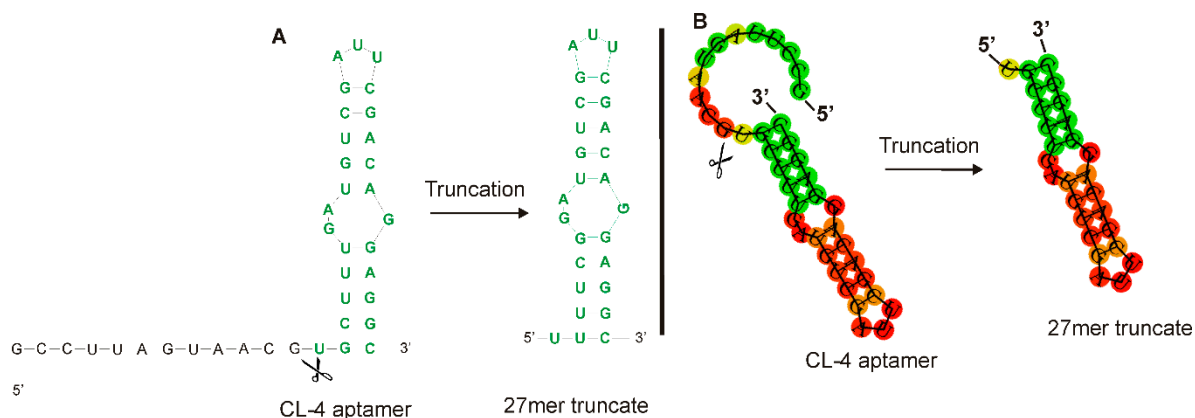

**Figure 1.** Predicted secondary structure of CL-4 aptamer and the 27mer truncated variant.

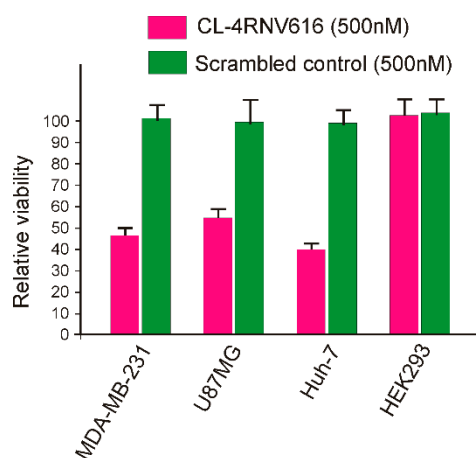

**Figure S2.** CL-4RNV616 aptamer specifically reduced the proliferation of EGFR positive cancer cells. EGFR positive Huh-7, MDA-MB-231, U87MG cells, as well as EGFR negative HEK293 cells were incubated with CL-4RNV616 aptamer at 500 nM concentrations for 72 h. The cell viability was determined via a MTT assay.

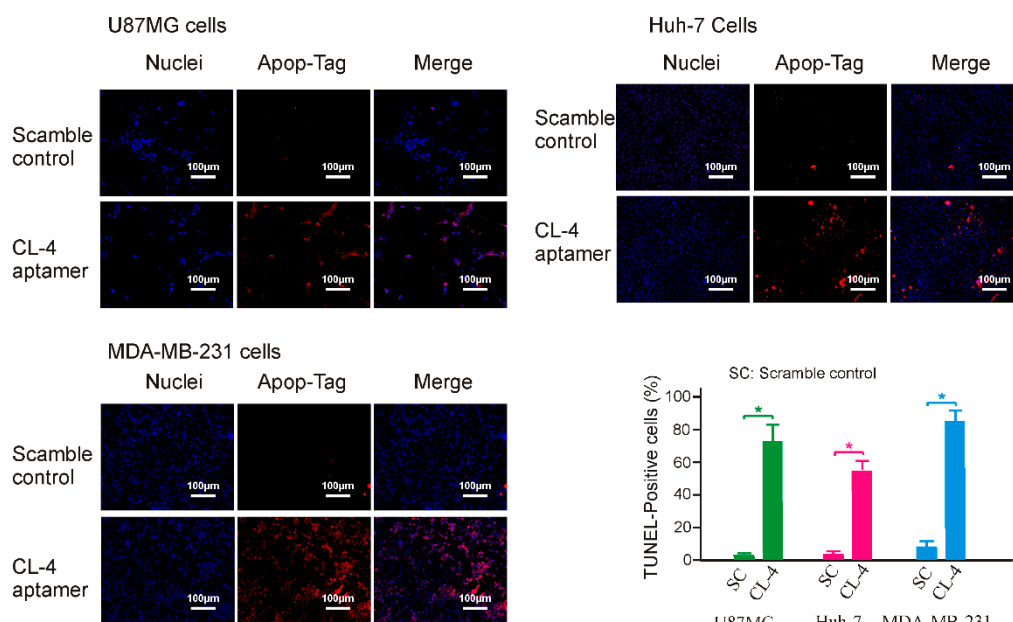

**Figure S3.** Evaluation of apoptotic induction effect of CL-4 aptamer on EGFR positive cancer cells. Representative micrograph of TUNEL assays on indicated cells after 72 h of treatment (at 500 nM).

Blue, Hoechst 33342 (nuclei) and red, Rhodamine for apopTag-positive nuclei. The relative quantification was determined via Image J program.

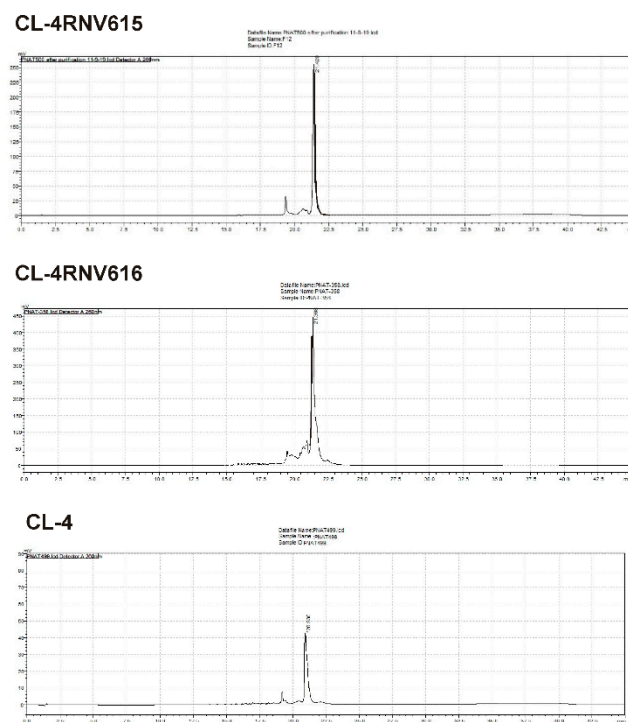

**Figure S4.** Ion Exchange-HPLC analysis of CL-4RNV615, CL-4.
